1 *Classification: Techniques-Ion channels-Cellular biology*

## 2 **IMAGING THE ELECTRICAL ACTIVITY OF ORGANELLES IN LIVING CELLS**

3 Ella Matamala<sup>1,2</sup>, Cristian Castillo<sup>2</sup>, Juan Pablo Vivar<sup>1</sup>, and Sebastian Brauchi<sup>1,2,3\*</sup>

4 <sup>1</sup>Instituto de Fisiologia, Facultad de Medicina, Universidad Austral de Chile, Campus Isla Teja sn, Valdivia,  
5 511-0566, Chile.

6 <sup>2</sup>Millennium Nucleus of Ion Channels-associated Diseases (MiNICAD)

7 <sup>3</sup>Janelia Research Campus, Howard Hughes Medical Institute, Ashburn, VA 20147

8

9

10 Running Title: “Electrical response of organelles reported by FRET”

11 \*Correspondence should be addressed to Dr. Sebastian Brauchi: [brauchis@hhmi.org](mailto:brauchis@hhmi.org)

12

13

14 **Keywords:** Organelle, membrane potential, TPC1, TRPML1, hVoS, dipikrylamine.

15 **Acknowledgments:** We thank David E Clapham (HHMI) for the use of his microscopes and support;

16 Kirill Kiselyov (U Pittsburg) for his helpful insights, and Alexandria Miller (HHMI) for her critical reading

17 of the manuscript. This work was supported by Anillo Científico #ACT1401. SB is part of UACH Program

18 for Cell Biology. MiNICAD is a Millennium Nucleus supported by Iniciativa Científica Milenio, Ministry of

19 Economy, Development and Tourism, Chile

20

21

22 **Abstract**

23 Eukaryotic cells are complex systems compartmentalized in membrane-bound organelles.  
24 Visualization of organellar electrical activity in living cells requires both a suitable reporter and  
25 non-invasive imaging at high spatiotemporal resolution. Here we present hVoS<sub>org</sub>, an optical  
26 method to monitor changes in the membrane potential of subcellular membranes. This method  
27 takes advantage of a FRET pair consisting of a membrane-bound voltage-insensitive fluorescent  
28 donor and a colorless voltage-dependent acceptor that rapidly moves across the membrane in  
29 response to changes in polarity. Compared to the currently available techniques, hVoS<sub>org</sub> has  
30 advantages including simple and precise subcellular targeting, the ability to record from  
31 individual organelles, and the potential for optical multiplexing.

32

33

34 **Summary**

35 By adapting a hybrid-FRET voltage sensor we report here the resting membrane potential of different  
36 organelles in living cells.

37

38

39

40 **Main Text.**

41 In general, charge separation as a result of the regulated flow of ions establishes a voltage gradient across  
42 semipermeable membranes. The voltage gradient across organelle membranes ( $\Psi_{\text{org}}$ ) will be then defined by  
43 the specific set of ion channels and transporter proteins expressed on a given organelle.  $\Psi_{\text{org}}$  is modulated  
44 by intracellular signaling cascades and is likely to be essential to the maintenance of organellar homeostasis  
45 <sup>1-6</sup>. While the central importance of the electrical activity of organelles has been widely acknowledged, the  
46 detailed mechanisms that support this type of signaling are poorly understood, partially due to the lack of  
47 the sophisticated research tools that have been developed for studies of voltage gradient changes at the  
48 plasma membrane <sup>7-11</sup>.

49 Membrane potential imaging using voltage-sensitive dyes has been extensively used for mitochondria and  
50 ER; and more recently, for phagosomes and lysosomes <sup>12-15</sup>. Still, a precise and standardized method  
51 allowing for the recording of electrical signals generated at individual organelles is not yet available. To this  
52 end, we have developed a general methodology for the recording of electrical signals from individual  
53 organelles. The method relies on the use of a Hybrid Voltage Sensor (hVoS) <sup>16</sup> and here we show its  
54 effectiveness for the fast imaging of variations in  $\Psi_{\text{org}}$  ( $\Delta\Psi_{\text{org}}$ ) in intact living cells.

55 The hVoS approach is extremely sensitive, capable of measuring rapid changes in the membrane potential  
56 of both excitable and non-excitable cells <sup>16-19</sup>. The method takes advantage of a FRET pair consisting of a  
57 membrane-anchored fluorescent protein acting as donor and the colorless hydrophobic anion  
58 dipicrylamine (DPA) acting as acceptor. Due to its small size, negatively charged DPA has the ability to  
59 rapidly transit across the membrane in response to changes in the membrane potential, acting as voltage  
60 sensor <sup>16</sup>. Conveniently, the imaging read-out of membrane potentials at the plasma membrane is linear  
61 within a broad dynamic voltage range (from -130 to +40 mV) <sup>18</sup>.

62 In principle, when combined with DPA, it is possible for any membrane-bound fluorescent marker to  
63 transduce voltage changes occurring at the target membrane into fluorescence fluctuations. Therefore,

64 fluorescently-tagged protein markers that are routinely used for selective subcellular expression provide a  
65 handy tool to image the electrical activity of internal membranes. For hVoS<sub>org</sub> to work, DPA must reach  
66 intracellular membranes (Fig. 1a). Once at the membrane it would distribute according a voltage-dependent  
67 equilibrium<sup>18,20</sup>. In such a scenario, each individual membrane compartment of the cell would define three  
68 equilibriums governing the distribution of DPA molecules – a lipid-water interphase at each side of the  
69 membrane and a voltage-dependent barrier governing DPA transit between the them (Fig. 1a)<sup>21</sup>.

70 Lysosomes are degradative organelles essential to maintain cellular metabolic activity. Their direct  
71 association with mTOR kinases is thought to integrate their catabolic role with different signaling cascades  
72 in the cell<sup>22</sup>. Several channels, transporters, and ion pumps such as the vesicular proton pump (v-ATPase),  
73 Two-Pore Na<sup>+</sup> Channels (TPCs), TMEM175 K<sup>+</sup> channels, members of the mucolipin subfamily of TRP  
74 channels (TRPMLs), SLC, CLC, and CLIC transporters, have been described as active residents of the  
75 endolysosomal system<sup>22–24</sup>. The expression patterns and localization of these proteins combined with  
76 electrophysiological data has led to the proposal that the lysosome is an electrically active organelle<sup>6,15</sup>.

77 Imaging of the membrane potential of lysosomes ( $\Psi_{ly}$ ) have been previously accomplished by using a  
78 combination of potentiometric fluorescent dyes (i.e. oxonol derivatives) forming a FRET pair with  
79 fluorophores that are *preferentially* segregated to the lysosome membrane<sup>15</sup>. However, the high density and  
80 variety of membrane-bound organelles within the endolysosomal system makes it impossible to isolate the  
81 individual contribution of endosomes, lysosomes, or phagosomes when a FRET pair is formed by  
82 hydrophobic dyes, imposing restrictions on spatial resolution and targeting.

83 Therefore, to optically follow rapid changes in  $\Psi_{ly}$ , we recorded voltage-sensitive FRET signals between  
84 DPA and a fluorescent protein of choice (i.e. EGFP or mCherry) fused to the cytoplasmic C-terminal  
85 domain of the lysosomal-associated membrane protein 1 (Lamp1). Our results indicated that hVoS<sub>org</sub>  
86 reliably reports the amplitude and kinetics of  $\Psi_{ly}$  at the level of single organelle. Being a single wavelength  
87 excitation/emission tool, based on cellular markers of common use, the versatility of the technique allowed

88 us for out-of-the-box recordings of other intracellular compartments. We report the resting potential of  
89 Golgi and ER membranes as examples of whether the technique could be easily expanded and multiplexed.

90

### 91 **Characterization and targeting of hVoS<sub>org</sub> to lysosomal membranes**

92 To first confirm that DPA can reach organellar membranes, we simultaneously followed two fluorescent  
93 markers, a farsenylated EGFP (FEGFP) that targets to the plasma membrane and Lamp1-mCherry that  
94 targets to the lysosome (Fig. 1b). As expected, we observe a loss of both fluorescent signals upon DPA  
95 addition (4  $\mu$ M) and that the quenching of the signal at the plasma membrane precedes the response at the  
96 lysosome (Fig. 1c). This confirms the effectiveness of the intracellular FRET pair, and more importantly,  
97 the ability of DPA to reach the internal membranes in living cells. According to previous studies, the  
98 FRET efficiency of hVoS is larger for fluorescent proteins that are excited at lower wavelengths<sup>18</sup>.  
99 Accordingly, most optical measurements of  $\Delta\Psi_{ly}$  were performed using Lamp1-EGFP to benefit the  
100 signal-to-noise ratio of the readout.

101 Lamp1 fluorescent constructs display a characteristic distribution that space-correlates well with other  
102 lysosome-resident proteins such as TRPML1 (mucolipin) and two-pore sodium channel 1 (TPC1) showing  
103 Pearson's coefficients of  $0.902 \pm 0.047$  and  $0.894 \pm 0.063$  respectively (Fig. 1d). In contrast, the endosomal  
104 marker Rab5 and the ER marker mTurquoise2-ER do not show significant colocalization with Lamp1 (Fig.  
105 1d).

106 In order to interpret the FRET readout, it is critical to know the orientation of the membrane-anchored  
107 fluorescent protein within the organelle membrane. To address this, we performed a fluorescence protease  
108 protection (FPP) assay<sup>25</sup>. According to the protein's design, the EGFP domain of our lysosomal marker  
109 should face to the cytoplasm. In good agreement to this, EGFP fluorescence rapidly quenches with trypsin  
110 (4 mM) after gentle permeabilization of the plasma membrane with digitonin (10  $\mu$ M) (Fig. 2a, *top*). We  
111 further validated this result with a fluorescence quenching experiment using Lyso-pHoenix, a lysosome-

112 targeted construct expressing the pH sensor pHluorin at the luminal side and the red-emitting fluorescent  
113 protein mKate facing the cytoplasm<sup>26</sup>. Under the same conditions used for Lamp1-EGFP, pHluorin signal  
114 remains stable while mKate fluorescence rapidly quenches upon the addition trypsin (Fig. 2a, *bottom*).

115 Wide field images revealed a characteristic ring shape on several of the Lamp1-EGFP positive structures  
116 (Supplementary Fig. 1a). The ring-shaped objects were usually between 1.2 and 0.9  $\mu\text{m}$  enclosing a hollow  
117 space of varying size, consistent with the dimensions of lysosome organelles (Supplementary Fig. 1 b and  
118 c). Analyzing the intensity of moving objects usually introduce error on the imaging data and requires  
119 correction. As lysosomes are moving objects inside the living cell, we first evaluated the relative mobility of  
120 Lamp1-EGFP labeled membranes<sup>27</sup>. By computing mobility maps we determine that at 20°C Lamp1-  
121 EGFP positive structures are relatively immobile during the two-minute window required for our  
122 recordings, eliminating the need for further correction of motion (Supplementary Fig. 1d).

123 An important contributor to the lysosomal membrane potential is the pH gradient ( $\Delta\mu\text{H}^+$ ), maintained by  
124 the vesicular proton pump (v-ATPase)<sup>28</sup>. Thus, perturbation of the  $\Delta\mu\text{H}^+$  would provide a simple  
125 approach to test our ability to measure  $\Psi_{\text{ly}}$  using  $\text{hVoS}_{\text{org}}$  in living cells. We first asked whether  
126 alkalinization of the lysosomal lumen can be induced directly by ammonium<sup>15,28,29</sup>. As expected,  
127 ammonium incubation (10 mM) causes a rapid and strong change in luminal pH, observed as an increase  
128 of fluorescence signal measured from the pH sensor pHluorin, which we localized to the lysosomal lumen  
129 (Fig. 2 b and d). Next, we repeated the experiment using Lamp1-EGFP in the presence and absence of  
130 DPA (Fig. 2 c and d). It has been estimated that 20 mM ammonium in the extracellular solution will  
131 depolarize the lysosomal membrane in about 40mV<sup>15</sup>. Accordingly, in the presence of DPA, ammonium  
132 quenches about 20% of GFP's fluorescence indicating a voltage-dependent DPA transit within the  
133 lysosomal membrane (Fig. 2d). Such quenching is absent when the voltage sensor is not present. On the  
134 contrary, a modest increase in EGFP's fluorescence can be detected after the ammonium treatment in the  
135 absence of DPA (Fig. 2d). This could be explained because  $\text{NH}_4^+$  will alkalinize not only cellular

136 compartments but also the cytoplasm. It has been reported that 20 mM ammonium in the external solution  
137 will cause a change in cytoplasmic pH of about 0.3 pH units<sup>30</sup>. Given the high buffer capacity of the  
138 cellular cytoplasm, we reasoned that normal fluctuations in cytoplasmic pH would not contaminate our  
139 membrane potential measurements. Under our imaging conditions (i.e. GFP facing the cytosol), a negative  
140 deflection of the fluorescence signal is caused by the redistribution of DPA molecules to the less negative  
141 outer leaflet of the lysosomal membrane (Fig. 2d), and we interpret this as depolarization of the lysosomal  
142 membrane. For the case of single membrane organelles (i.e. ER, lysosomes, endosomes, and golgi)  $\Delta\Psi$  is  
143 calculated by  $V_{m_{org}} = V_{cytosol} - V_{lumen}$ <sup>31</sup>, therefore our results indicate that alkalinization of the lysosome lumen  
144 causes a rapid depolarization of the organelle's membrane as reported before<sup>15</sup>.

145 To further examine whether hVoS<sub>org</sub> is capable of following rapid changes in  $\Psi_{ly}$ , we used the optogenetic  
146 tool Lyso-pHoenix. Lyso-pHoenix is a large protein sensor composed by mKate at the cytoplasmic N-  
147 terminal domain followed by the light activated proton pump Arch, and pHluorin on the luminal C-  
148 terminal domain of the protein<sup>26</sup>. The sensor targets the lysosome via a Lamp3 destination signal  
149 (Supplementary Fig. 2a). The light-dependent activity of Arch is clearly visible in the lysosome upon v-  
150 ATPase inhibition by Bafilomycin A1 (Baf), which is used to initially prevent proton influx into the  
151 lysosomal lumen<sup>26</sup>. After 20 minutes of incubation with Baf (300 nM) and DPA (4  $\mu$ M), light pulses (10  
152 mW s<sup>2</sup>  $\mu$ m<sup>2</sup>; 560 nm) delivered at 0.3 Hz induces the activation of Arch, causing lysosomal acidification as  
153 monitored by fluorescence of pHluorin (Supplementary Fig. 2b). This acidification correlates with a  
154 simultaneous increase in the fluorescence signal of the otherwise voltage-insensitive mKate protein, which  
155 indicates a redistribution of DPA towards the luminal leaflet of the lysosomal membrane, away from  
156 mKate (Supplementary Fig. 2 b and c). The observed increase in mKate fluorescence suggests a  
157 repolarization of the lysosomal membrane. Taken together, our approach not only demonstrates the ability  
158 to follow the amplitude and kinetics of changes in  $\Psi_{ly}$  but also confirms the importance of luminal pH in  
159 setting the resting potential of lysosomes.

160

## 161 **Calibration of the hVoS<sub>org</sub> signal**

162 The transport of ions into the lumen of the lysosome depends on the electrochemical gradient. At rest, the  
163 electrochemical gradient of lysosomes can be roughly separated in two components – the chemical gradient  
164 of protons (H<sup>+</sup>) ( $\Delta\text{pH}_{\text{ly}}$ ), and the lysosomal membrane potential ( $\Psi_{\text{ly}}$ )<sup>32</sup>. Ammonium treatments provides  
165 us with a rough estimate of the voltage versus fluorescence response of our probe. To better control over  
166 the voltage across the lysosomal membrane, we performed an *In-cell* calibration of hVoS<sub>org</sub> by using  
167 potassium (K<sup>+</sup>) as the only permeating ion. Gently digitonin-permeabilized cells were incubated with  
168 nigericin, an antiporter of H<sup>+</sup> and K<sup>+</sup> (to dissipate  $\Delta\text{pH}_{\text{ly}}$ ), and the K<sup>+</sup>-selective ionophore valinomycin, to  
169 have control of  $\Psi_{\text{ly}}$  simply by changing the K<sup>+</sup> concentration in the extracellular solution now in contact  
170 with the external membrane of the lysosome (Fig. 3 a and b). By doing this, we observed a linear of the  
171 response up to 120 mV (positive inside). Considering the signal-to-noise ratio we estimated the limit of  
172 detection to be  $0.9 \pm 0.4$  % of  $\Delta F/F$ , corresponding to about 8mV (Fig. 3b).

173 By simply analyzing changes in  $\Delta F/F$  of lysosomes transiting from resting to a condition where the  $\Psi_{\text{ly}}$   
174 should be close to zero (i.e. digitonin permeabilization of the lysosomal membrane) we estimated that the  
175 resting potential of the lysosome is about  $115 \pm 22$  mV (lumen positive; n=7) (Fig. 3 c and d;  
176 supplementary movie 1). When observed in more detail, we observe that the Lamp1-positive structures on  
177 the periphery appear to have a smaller  $\Psi_{\text{ly}}$  at rest (Supplementary Fig. 3). We estimated that  $\Psi_{\text{ly}}$  ranges from  
178 60 to 110 mV (positive inside) and would not be unreasonable to propose that these differences can be  
179 explained by the pH gradient observed in lysosomes during maturation<sup>33</sup>.

180 We used the same experimental approach to examine the resting transmembrane potential of Golgi ( $\Psi_{\text{go}}$ )  
181 and ER ( $\Psi_{\text{ER}}$ ) endomembranes. The Golgi marker mannosidase II fused to EGFP (EGFP-ManII) reported  
182  $79 \pm 6$  mV (positive inside; n=4) and the ER marker Sec61b fused to a HaloTag<sup>34</sup> (ht-Sec61b + Janelia  
183 Fluor 556) reported  $-25 \pm 9$  mV (negative inside; n=3) (Figure 3d). Measuring the transmembrane potential



184 of trans Golgi network has been elusive and previously estimated close to zero mV<sup>35</sup>. By localizing hVoS<sub>org</sub>  
185 to the Golgi membrane we present the first direct measurement of resting membrane potential of this  
186 compartment in living cells. Moreover, the confirmation that HaloTag can be used in combination with  
187 DPA opens many possibilities for multiplexing intracellular voltage signals and to explore more subtle  
188 aspects of lysosomal and cellular physiology<sup>22,23,36,37</sup>.

189

## 190 **Modulation of lysosomal membrane potential by TRPML1 and TPC channels**

191 To explore the contribution of known ion channels that are native in lysosomal membranes, we used  
192 hVoS<sub>org</sub> to estimate  $\Psi_{ly}$  at rest with overexpression of TPC1 and TRPML1. In both cases a smaller  
193 quenching of the GFP signal was obtained, suggesting that the lysosomal membrane is less polarized upon  
194 overexpression (Fig. 3d). This observation suggests that the overexpressed channels are active and that  
195 their activity cannot be compensated efficiently by the v-ATPase or other lysosomal control mechanisms.  
196 TPC1 seems to be particularly effective on collapsing the resting potential of the lysosome. This suggests  
197 that the intrinsic voltage-sensitivity of the channel might create a positive-feedback loop when is not well  
198 compensated.

199 The mammalian target of rapamycin (mTOR) is a kinase that integrates intracellular level of nutrients, the  
200 energetic state, and growth factor signaling in higher eukaryotes<sup>38</sup>. Starvation and/or rapamycin treatment  
201 (a general mTOR inhibitor) induce a robust electrical response of the endosome/lysosome (EL) vesicular  
202 compartment, linking mTOR signaling and TPC sodium channels<sup>39</sup>. Moreover, the activity of mTORC1  
203 has been associated to the activity of the SLC sodium-coupled amino acid transporter and also to the  
204 activity of the lysosomal v-ATPase<sup>40,41</sup>. Consistent with the notion that the mTOR-signaling network is  
205 associated to lysosomal electrical activity<sup>42</sup>, we observed that incubations with rapamycin (5  $\mu$ M) evoked a  
206 strong and transient depolarization in intact lysosomes of living cells (Fig. 4; supplementary movie 2). The  
207 depolarization of the lysosomal membrane is in agreement with previous reports showing a Na<sup>+</sup> efflux

208 from the lumen of enlarged endolysosomes into the cytosol <sup>6,39</sup>. It is worth noticing that even in the  
209 presence of rapamycin a late repolarization component is clearly visible, which may correspond to a voltage  
210 dependent component that could be fulfilled by BK channels present at the lysosomal membrane (Fig. 4c)  
211 <sup>43</sup>. Additionally, we attempt to multiplex the signals by co-expressing Lamp1-EGFP and ht-Sec61b.  
212 Simultaneous imaging of  $\Delta\Psi_{ly}$  and  $\Delta\Psi_{ER}$  was performed in response to rapamycin and followed by  
213 digitonin permeabilization, showing a clear temporal separation of responses and the ability to space-  
214 resolve the signals from both compartments (supplementary movie 3).  
215 We then compared the averaged response of lysosomes to rapamycin in cells expressing Lamp1-EGFP  
216 alone or co-expressed with either hTPC1 or hTRPML1 ion channels (Fig. 4a). We calculated that the  
217 rapamycin-dependent depolarization dissipates the lysosomal resting potential by  $85 \pm 4$  mV (n=4) (Fig. 4  
218 c and d), which corresponds to nearly 75% reduction of  $\Psi_{ly}$  at rest. In contrast, the overexpression of both  
219 TPC1 and TRPML1 channels showed a lower effect on  $\Psi_{ly}$  ( $30 \pm 6$  and  $15 \pm 4$  mV respectively; n=3) (Fig.  
220 4 c and d). The time course of the response can be described by a single exponential decay with a  
221 characteristic time constant that is significantly different between normal lysosomes ( $12.3 \pm 3.3$  s; n=4) and  
222 those with lysosomal channels overexpressed ( $p < 0.01$ ; Fig. 4c). The kinetics of the lysosomal response is  
223 shifted towards smaller values for both TPC1 ( $4.8 \pm 1.6$  s; n=3) and TRPML1 transfected cells ( $5.7 \pm 1.2$  s;  
224 n=3) (Fig. 4c). The acceleration observed in the response when TPC1 channels are overexpressed suggests  
225 that they are not close to the maximal open probability under overexpression conditions <sup>6</sup>.  
226 Although the smaller dissipation of the voltage gradient correlates well with the ability to set a more  
227 depolarized resting potential, the acceleration on depolarization kinetics together with the appearance of a  
228 late seemingly voltage-dependent component, suggests to us that we cannot work under the assumption  
229 that the lysosome membrane operates as a simple resistor-capacitor circuit. Thus, our results suggest that  
230 the overexpression of ion channels that are residents of the lysosome affect the resting potential and in  
231 doing so the dynamic response of the lysosome.

232

## 233 **Discussion**

234 The membrane potential is a major regulator of electrogenic transport across membranes. Therefore,  
235 organelle function and by extension the metabolic state of the cell, is modulated by the membrane potential  
236 of organelles. Lysosome membranes contain several voltage-gated ion channels and transporters,  
237 suggesting that a fine-tuning of lysosomal function is modulated by the membrane potential <sup>22</sup>. Imaging  
238  $\Delta\Psi_{ly}$  have been successfully accomplished in the past by using a combination of potentiometric fluorescent  
239 dyes (i.e. oxonol derivatives) forming a FRET pair with fluorophores that are *preferentially* segregated to the  
240 lysosome membrane <sup>15</sup>. However, the high density and variety of membrane-bound organelles make  
241 impossible to isolate the individual contribution of endosomes, lysosomes or phagosomes when a FRET  
242 pair is formed by hydrophobic dyes, imposing restrictions on spatial resolution and targeting. When a  
243 FRET system is set between a pair of light emitting probes, spectral properties have to be controlled to  
244 avoid optical leak and bleed-through. As the FRET pair used here consists of a fluorescent protein donor  
245 and a colorless acceptor, there is no need for bleed-through correction. By changing the paradigm,  
246 providing a colorless FRET acceptor reaching intracellular membranes combined with well-tested organelle  
247 markers, our single wavelength excitation method contributes on solving the problem of targeting the  
248 FRET pair to specific intracellular compartments together with providing a larger set of optical markers to  
249 be used. Moreover, DPA have the advantage of acting as FRET acceptor for fluorescent proteins in all  
250 visible range making an ideal sensor for optical multiplexing of organelle's activity.

251 By targeting hVoS<sub>org</sub> we effectively measure changes in membrane potential resolved in time and space  
252 within living cells (Fig. 5), an experimental feat that has not been previously possible. The present hVoS<sub>org</sub>  
253 approach not only allows recording of membrane potentials in intact cells but demonstrate to be robust  
254 enough measure the elusive resting potential of intact individual sub-cellular structures that include  
255 lysosomes, Golgi, and ER.

256 We also showed the ability of performing simultaneous measurements from different intracellular  
257 membranes, demonstrating the capacity of hVoS<sub>org</sub> to provide new insights for cell biologists into whether  
258 organelle-localized signals are modulated as a result of changes in organelle membrane potentials. We  
259 foresee that combinations of sensors having different spectral properties, targeted to distinct sub-cellular  
260 compartments, will allow for detailed space-time correlations of organelle's activity in living cells<sup>37,44</sup>.

261

262

## 263 **METHODS**

264 *Cell culture and clones.* HEK293 cells were cultured in DMEM supplied with 10% FBS. Cells were  
265 plated in poly-l-lysine coated coverslips and transfected using lipofectamine 2000 (Invitrogen). Recordings  
266 were made 24-36 hours after transfection. Lamp1GFP was a gift from Patricia Burgos (Universidad Austral  
267 de Chile), hTPC1 was a gift from Dejian Ren (University of Pennsylvania), TRPML1 was a gift from Kirill  
268 Kiselyov (University of Pittsburg), halo-Sec61b and sapphire-manosidase II were a gift from Jennifer  
269 Lippincott-Schwartz (Janelia Research Center), farsenylated EGFP was a gift from Baron Chanda, hVoS  
270 (Addgene plasmid # 45282) was a gift from Meyer B. Jackson, Lyso-pHluorin (Addgene plasmid # 70113)  
271 and Lyso-pHoenix (Addgene plasmid # 70112) were a gift from Christian Rosenmund, and mTurquoise2-  
272 ER (Addgene plasmid # 36204) was a gift from Dorus Gadella. EGFP-ManII was obtained by PCR  
273 amplification of Sec61b from sapphire-ManII and introducing the amplified fragment in pEGFP-C1 vector.

274 *Reagents.* Dipicrylamine sodium salt was obtained from Biotium Inc. (Fremont, CA). Rapamycin, DMSO,  
275 and ammonium chloride were obtained from Sigma-Aldrich. Valinomycin and nigericin were obtained  
276 from Tocris Bioscience (Bristol, UK). Standard salts used for solutions were obtained from Merck.

277 *Solutions and drug delivery.* Dipicrylamine sodium salt (DPA) was prepared fresh at 20 mM stocks in  
278 DMSO and used at a final concentration of 4 μM. Extracellular solution contained NaCl (140 mM), KCl (5  
279 mM), Ca Cl<sub>2</sub> (2mM), Mg Cl<sub>2</sub> (2mM), Glucose (5 mM), HEPES (8 mM) at pH 7.34. Cells were incubated

280 with DPA for at least 10 minutes before start the experiments. In all the experiments the ringer solution  
281 contained DPA (4  $\mu$ M) and DMSO (0.15 % v/v). At all times the concentration of both DPA and DMSO  
282 remained constant in the external solution. The drug-delivering pipette was placed close to the cell using a  
283 mechanical manipulator (Narishige, Tokio, Japan) and was pressure-ejected using a microliter syringe  
284 (Supplementary Figure 4). To make the voltage versus fluorescence calibration curve cells were first gently  
285 permeabilized with digitonin (10  $\mu$ M, 3 min) in a solution containing KCl (130 mM), NaCl (10 mM), Ca Cl<sub>2</sub>  
286 (2mM), Mg Cl<sub>2</sub> (2mM), MgATP (5 mM), Glucose (5 mM), HEPES 8mM at pH 7. 4. Nigericyn and  
287 Alamethicyn were delivered to the extracellular solution in contact with the lysosomal membrane after  
288 permeabilization. Prior solution exchange, lysosomes were equilibrated with the 130 mM K<sup>+</sup> buffer for 5 to  
289 10 minutes, in the presence of antibiotics.

290 **Image acquisition.** *Voltage Imaging.* An Orca Flash 4.0 CMOS camera (Hamamatsu Photonics, Japan) was  
291 used to image fluorescence. Acquisition was performed in streaming mode sampling at 20-10Hz without  
292 binning. For some experiments an electronic shutter (Uniblitz, VA Inc., Rochester, NY) was used. The  
293 camera was mounted on an Olympus IX71 microscope. Images were taken under normal epifluorescence,  
294 using a water immersion objective (60x, N.A.=1.3). A 473 nm (Melles Griot, Carlsbad, CA) and 532 nm  
295 (LaserGlow, Toronto, Canada) diode pump lasers were transmitted via the rear illumination port of the  
296 microscope and reflected to the sample by a double dichroic mirror with reflection bands at 473-490 nm  
297 and 530-534 nm and transmission bands at 500-518 nm and 550-613 nm (Semrock, Rochester, NY)  
298 (Supplementary Figure 4). *Space correlated imaging.* The optical system described above was used in  
299 combination to a DualView system (Photometrics, Tucson, AZ), splitting the emission signal in two  
300 channels (490/40 and 600/70 nm) that are focused simultaneously on the CMOS chip (Supplementary  
301 Figure 4). All image acquisition was controlled by micro-manager (Open Imaging, San Francisco, CA).

302 **Signal analysis.** *Colocalization.* After background subtraction, 20 frames of space-correlated images were  
303 averaged and overlay images were produced further over imposed on Cairn optosplit plugin for ImageJ. To

304 evaluate pixel colocalization we calculate Pearson's coefficient using JACoP plugin for ImageJ<sup>45</sup>. *Mobility*  
305 *maps*. We performed the calculation following the protocol in Brauchi et al. 2008. The fluorescence signal  
306 was lower-threshold over 2 standard deviations above the mean of the camera noise. The upper threshold  
307 was set identify the desired lysosomal-shaped objects. Threshold images were converted into binary format  
308 events. The mobility function was calculated for each pixel of the image sequence. *Fluctuation of fluorescence*.  
309 To calculate fluorescence kinetics on pHluorin and DPA-GFP experiments, regions of interest (ROIs)  
310 were established on doughnut shaped, Lamp1-positive spots having a size between 50 and 200 nm (5-20  
311 pixels), located on regions of low mobility. Several regions of interest (ROIs) per cell were selected from  
312 background-subtracted stacks. All together shape, size, mobility, and localization helped us to define the  
313 ROI set that was measured on each cell. After selection, fluorescence time course was recorded for each  
314 ROI. Numerical data was treated and plotted using OriginPro (OriginLab corporation, Wellesley Hills,  
315 MA). Fractional fluorescence change was calculated according to:  $\Delta F/F = ((F_n - F_0) / F_0)$ , where,  $F_n$  is the  
316 corrected fluorescence at frame  $n$ , and  $F_0$  corresponds to the average of at least 10 frames of the base line  
317 fluorescence. Baseline fluorescence corresponds to the steady state GFP signal after DPA equilibration.  
318 Once  $\Delta F/F$  was calculated bleaching was corrected by using a single exponential function fitting the decay  
319 of fluorescence at baseline. Data was often filtered by a FTT filter (implemented in OriginPro) with a cut  
320 off  $1/4^{\text{th}}$  of the sampling frequency.

321 ***Statistics and figure preparation.*** Voltage measurements. Individual cells on one day of transfection  
322 contribute with several lysosomes (in the order of 10 to 25 per cell), which are considered as replicates.  
323 Therefore the histograms presented corresponds to  $n = 1$  and contains information from several individual  
324 lysosomes. The final statistical procedure was done by performing one-way ANOVA comparing the  
325 differences observed in several independent experiments per condition. A p-value of 0.01 was considered  
326 significant and a Bonferroni post-test was performed for all pairwise comparisons tests. Plotting the mean  
327 value of the signal generated histograms that were used to present data. The histograms were fitted to a

328 Gaussian distribution function to evaluate normality (also evaluated by Kolmogorov-Smirnov test  
329 implemented in Origin). The statistical analysis were computed in Microcal OriginPro ver9 (OriginLab)  
330 Figures were prepared using Microcal OriginPro ver9 and ImageJ.

331

332

### 333 Reference list

334

- 335 1. Chen, Y. *et al.* Functional K(v)10.1 channels localize to the inner nuclear membrane. *PLoS One* **6**,  
336 e19257 (2011).
- 337 2. Hilgemann, D. W., Fine, M., Linder, M. E., Jennings, B. C. & Lin, M.-J. Massive endocytosis  
338 triggered by surface membrane palmitoylation under mitochondrial control in BHK fibroblasts. *Elife*  
339 **2**, e01293 (2013).
- 340 3. Kühn, F. J. P., Heiner, I. & Lückhoff, A. TRPM2: a calcium influx pathway regulated by oxidative  
341 stress and the novel second messenger ADP-ribose. *Pflugers Arch.* **451**, 212–9 (2005).
- 342 4. Nordeen, M. H., Jones, S. M., Howell, K. E. & Caldwell, J. H. GOLAC: an endogenous anion  
343 channel of the Golgi complex. *Biophys. J.* **78**, 2918–28 (2000).
- 344 5. Thompson, R. J., Akana, H. C. S. R., Finnigan, C., Howell, K. E. & Caldwell, J. H. Anion channels  
345 transport ATP into the Golgi lumen. *Am. J. Physiol. Cell Physiol.* **290**, C499-514 (2006).
- 346 6. Cang, C., Bekele, B. & Ren, D. The voltage-gated sodium channel TPC1 confers endolysosomal  
347 excitability. *Nat. Chem. Biol.* **10**, 463–9 (2014).
- 348 7. Cagin, U. & Enriquez, J. A. The complex crosstalk between mitochondria and the nucleus: What  
349 goes in between? *Int. J. Biochem. Cell Biol.* **63**, 10–15 (2015).
- 350 8. Elbaz, Y. & Schuldiner, M. Staying in touch: The molecular era of organelle contact sites. *Trends*  
351 *Biochem. Sci.* **36**, 616–623 (2011).

- 352 9. Helle, S. C. J. *et al.* Organization and function of membrane contact sites. *Biochim. Biophys. Acta - Mol.*  
353 *Cell Res.* **1833**, 2526–2541 (2013).
- 354 10. Kaasik, A. *et al.* Energetic crosstalk between organelles: architectural integration of energy  
355 production and utilization. *Circ. Res.* **89**, 153–159 (2001).
- 356 11. Stefan, C. J., Manford, A. G. & Emr, S. D. ER–PM connections: sites of information transfer and  
357 inter-organelle communication. *Curr. Opin. Cell Biol.* **25**, 434–442 (2013).
- 358 12. Kinnally, K. W., Tedeschi, H. & Maloff, B. L. Use of dyes to estimate the electrical potential of the  
359 mitochondrial membrane. *Biochemistry* **17**, 3419–28 (1978).
- 360 13. Russell, J. T., Beeler, T. & Martonosi, A. Optical probe responses on sarcoplasmic reticulum.  
361 Merocyanine and oxonol dyes. *J. Biol. Chem.* **254**, 2047–52 (1979).
- 362 14. Steinberg, B. E., Touret, N., Vargas-Caballero, M. & Grinstein, S. In situ measurement of the  
363 electrical potential across the phagosomal membrane using FRET and its contribution to the  
364 proton-motive force. *Proc. Natl. Acad. Sci. U. S. A.* **104**, 9523–8 (2007).
- 365 15. Koivusalo, M., Steinberg, B. E., Mason, D. & Grinstein, S. In situ measurement of the electrical  
366 potential across the lysosomal membrane using FRET. *Traffic* **12**, 972–82 (2011).
- 367 16. Chanda, B. *et al.* A hybrid approach to measuring electrical activity in genetically specified neurons.  
368 *Nat. Neurosci.* **8**, 1619–1626 (2005).
- 369 17. DiFranco, M., Capote, J., Quiñonez, M. & Vergara, J. L. Voltage-dependent dynamic FRET signals  
370 from the transverse tubules in mammalian skeletal muscle fibers. *J. Gen. Physiol.* **130**, 581–600 (2007).
- 371 18. Wang, D., Zhang, Z., Chanda, B. & Jackson, M. B. Improved probes for hybrid voltage sensor  
372 imaging. *Biophys. J.* **99**, 2355–65 (2010).
- 373 19. Gahl, R. F., Tekle, E., Zhu, G. A., Taraska, J. W. & Tjandra, N. Acquiring snapshots of the  
374 orientation of trans-membrane protein domains using a hybrid FRET pair. *FEBS Lett.* **589**, 885–889  
375 (2015).



- 376 20. Zachariassen, L. G. *et al.* Structural rearrangement of the intracellular domains during AMPA  
377 receptor activation. *Proc. Natl. Acad. Sci.* **113**, E3950–E3959 (2016).
- 378 21. Fernández, J. M., Taylor, R. E. & Bezanilla, F. Induced capacitance in the squid giant axon.  
379 Lipophilic ion displacement currents. *J. Gen. Physiol.* **82**, 331–346 (1983).
- 380 22. Xu, H. & Ren, D. Lysosomal Physiology. *Annu. Rev. Physiol.* **77**, 57–80 (2015).
- 381 23. Cang, C., Aranda, K., Seo, Y. J., Gasnier, B. & Ren, D. TMEM175 Is an Organelle K<sup>+</sup> Channel  
382 Regulating Lysosomal Function. *Cell* **162**, 1101–1112 (2015).
- 383 24. Chapel, A. *et al.* An Extended Proteome Map of the Lysosomal Membrane Reveals Novel Potential  
384 Transporters. *Mol. Cell. Proteomics* **12**, 1572–1588 (2013).
- 385 25. Lorenz, H., Hailey, D. W. & Lippincott-Schwartz, J. Fluorescence protease protection of GFP  
386 chimeras to reveal protein topology and subcellular localization. *Nat Methods* **3**, 205–210 (2006).
- 387 26. Rost, B. R. *et al.* Optogenetic acidification of synaptic vesicles and lysosomes. *Nat. Neurosci.* **18**,  
388 1845–52 (2015).
- 389 27. Brauchi, S., Krapivinsky, G., Krapivinsky, L. & Clapham, D. E. TRPM7 facilitates cholinergic  
390 vesicle fusion with the plasma membrane. *Proc. Natl. Acad. Sci. U. S. A.* **105**, 8304–8 (2008).
- 391 28. Mindell, J. A. Lysosomal Acidification Mechanisms. *Annu. Rev. Physiol.* **74**, 69–86 (2012).
- 392 29. Ohkuma, S. & Poole, B. Fluorescence probe measurement of the intralysosomal pH in living cells  
393 and the perturbation of pH by various agents. *Proc. Natl. Acad. Sci. U. S. A.* **75**, 3327–31 (1978).
- 394 30. Ramirez, M., Fernandez, R. & Malnic, G. Permeation of NH<sub>3</sub>/NH<sub>4</sub><sup>+</sup> and cell pH in colonic  
395 crypts of the rat. *Pflugers Arch. Eur. J. Physiol.* **438**, 508–515 (1999).
- 396 31. Bertl, A. *et al.* Electrical measurements on endomembranes. *Science* **258**, 873–4 (1992).
- 397 32. Saroussi, S. & Nelson, N. Vacuolar H<sup>(+)</sup>-ATPase-an enzyme for all seasons. *Pflugers Arch.* **457**, 581–  
398 587 (2009).
- 399 33. Johnson, D. E., Ostrowski, P., Jaumouillé, V. & Grinstein, S. The position of lysosomes within the

- 400 cell determines their luminal pH. *J. Cell Biol.* **212**, 677–692 (2016).
- 401 34. England, C. G., Luo, H. & Cai, W. HaloTag Technology: A Versatile Platform for Biomedical  
402 Applications. *Bioconj. Chem.* **26**, 975–986 (2015).
- 403 35. Schapiro, F. B. & Grinstein, S. Determinants of the pH of the Golgi complex. *J. Biol. Chem.* **275**,  
404 21025–21032 (2000).
- 405 36. Mauvezin, C., Nagy, P., Juhasz, G. & Neufeld, T. P. Autophagosome-lysosome fusion is  
406 independent of V-ATPase-mediated acidification. *Nat Commun* **6**, 7007 (2015).
- 407 37. Li, P., Gu, M. & Xu, H. Lysosomal Ion Channels as Decoders of Cellular Signals. *Trends Biochem. Sci.*  
408 **44**, 110–124 (2019).
- 409 38. Betz, C. & Hall, M. N. Where is mTOR and what is it doing there? *J. Cell Biol.* **203**, 563–74 (2013).
- 410 39. Cang, C. *et al.* mTOR regulates lysosomal ATP-sensitive two-pore Na<sup>(+)</sup> channels to adapt to  
411 metabolic state. *Cell* **152**, 778–90 (2013).
- 412 40. Wang, S. *et al.* The amino acid transporter SLC38A9 is a key component of a lysosomal membrane  
413 complex that signals arginine sufficiency to mTORC1. *Science (80-. )*. **347**, 188–194 (2015).
- 414 41. Zoncu, R. *et al.* mTORC1 Senses Lysosomal Amino Acids Through an Inside-Out Mechanism That  
415 Requires the Vacuolar H<sup>+</sup>-ATPase. *Science (80-. )*. **334**, 678–683 (2011).
- 416 42. Ballou, L. M. & Lin, R. Z. Rapamycin and mTOR kinase inhibitors. *J. Chem. Biol.* **1**, 27–36 (2008).
- 417 43. Cao, Q. *et al.* BK Channels Alleviate Lysosomal Storage Diseases by Providing Positive Feedback  
418 Regulation of Lysosomal Ca<sup>2+</sup> Release. *Dev. Cell* **33**, 427–441 (2015).
- 419 44. Zhang, Q. *et al.* Visualizing Dynamics of Cell Signaling In Vivo with a Phase Separation-Based  
420 Kinase Reporter. *Mol. Cell* 1–13 (2018). doi:10.1016/j.molcel.2017.12.008
- 421 45. Bolte, S. & Cordelières, F. P. A guided tour into subcellular colocalisation analysis in light  
422 microscopy. *J. Microsc.* **224**, 13–232 (2006).
- 423

424

425 FIGURES and LEGENDS

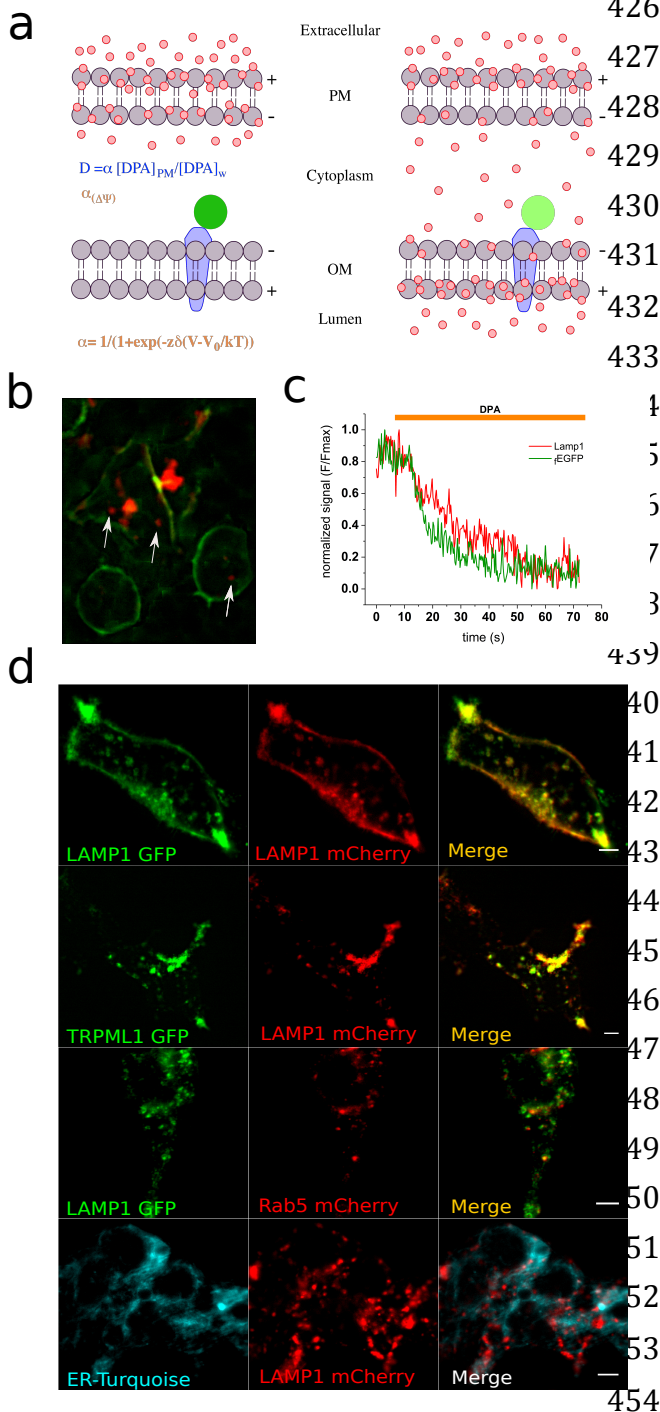

426 **Figure 1.** Dipikrylamine (DPA) reaches internal  
427 membranes. **(a)** Schematic representation of DPA  
428 incorporation and distribution within the cell. Knowing  
429 the concentration of DPA at the extracellular medium  
430 and the partition coefficient ( $D$ ), it is possible to  
431 calculate the concentration at the membrane and also  
432 the voltage-dependent probability ( $\alpha$ ) of being on a  
433 given leaflet. The two membranes are in series and are  
4 opposite in polarity, causing accumulation of DPA in  
5 the lumen of internal compartments. The voltage-  
6 dependent movement of DPA molecules within the  
7 membrane will alter GFP fluorescence, making us able  
8 to differentiate hyperpolarization and depolarization of  
9 the organelle. **(b)** Simultaneous expression of Lamp1-  
10 mCherry (*lysosome marker*) and farnesylated GFP  
11 (*plasma membrane marker*) in HEK293 cells. Arrows  
12 indicate lysosomes not forming clusters. **(c)** Time  
13 course of fluorescence for the cell in b when exposed  
14 to DPA. The lysosomal signal corresponds to the  
15 average of the three spots indicated by arrows in panel  
16 b. **(d)** Representative colocalization images of the  
17 lysosomal marker Lamp1. Similar level of  
18 colocalization are observed for EGFP-/mCherry-  
19 tagged Lamp1 and Lamp1-mCherry / TRPML1-GFP.  
20 A low level of colocalization is observed between the  
21 endosomal marker Rab5 and Lamp1 or between the  
22 ER marker ER-turquoise/Lamp1-EGFP. Scale bars  
23 correspond to 5  $\mu\text{m}$ .

454  
455 Figure 1. Matamala et al

456

457

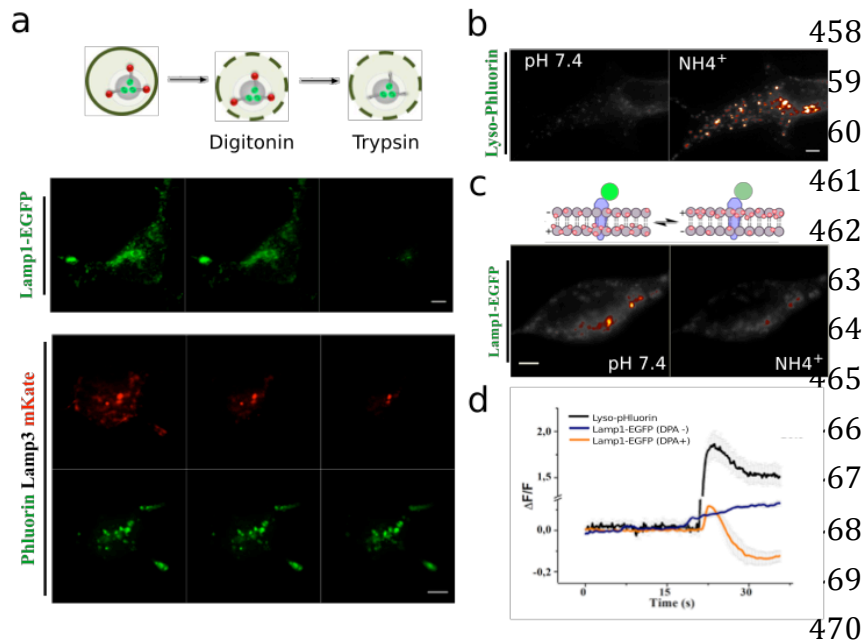

458 **Figure 2.** Topology of Lamp1-  
459 EGFP by FPP assay and the effect  
460 of lysosomal pH on hVoS<sub>org</sub> signals.  
461 **(a)** Cartoon of the FPP assay  
462 illustrating the position of the  
463 fluorescent tags relative the  
464 organelle membrane (*top*). Lamp1-  
465 EGFP exposes the fluorescent  
466 protein to the cytoplasm as revealed  
467 by protease protection assay (scale  
468 bar, 5 μm). HEK-293T cells  
469 expressing lyso-pHoenix (pHluorin-  
470 CD63-pHluorin-Arch3-mKate)

471 were subjected to the FPP assay

472 (*lower panels*). FPP in this case revealed that pHluorin faces the lumen while mKate faces the cytoplasm. Images were  
473 taken before and after 2-min treatment with 10 μM digitonin followed by perfusion with a ringer containing 4 mM  
474 trypsin. The steps of the assay are indicated in the cartoon on top. **(b)** Fluorescence images of HEK-293 cells  
475 transfected with a plasmid encoding for a luminal pH sensor (pHluorin), before (*left*) and after (*right*) ammonium  
476 treatment. **(c)** Fluorescence images of HEK-293 cells transfected with a Lamp1-EGFP), before (*left*) and after (*right*)  
477 ammonium treatment. The cartoon on top depicts the transit of DPA molecules (red circles) and quenching of  
478 EGFP's fluorescence (green circles) during depolarization of the lysosome. **(d)** Plot of intensity versus time for the  
479 ammonium treatment in different conditions. The arrow denotes addition of NH<sub>4</sub><sup>+</sup>.

480

481

482

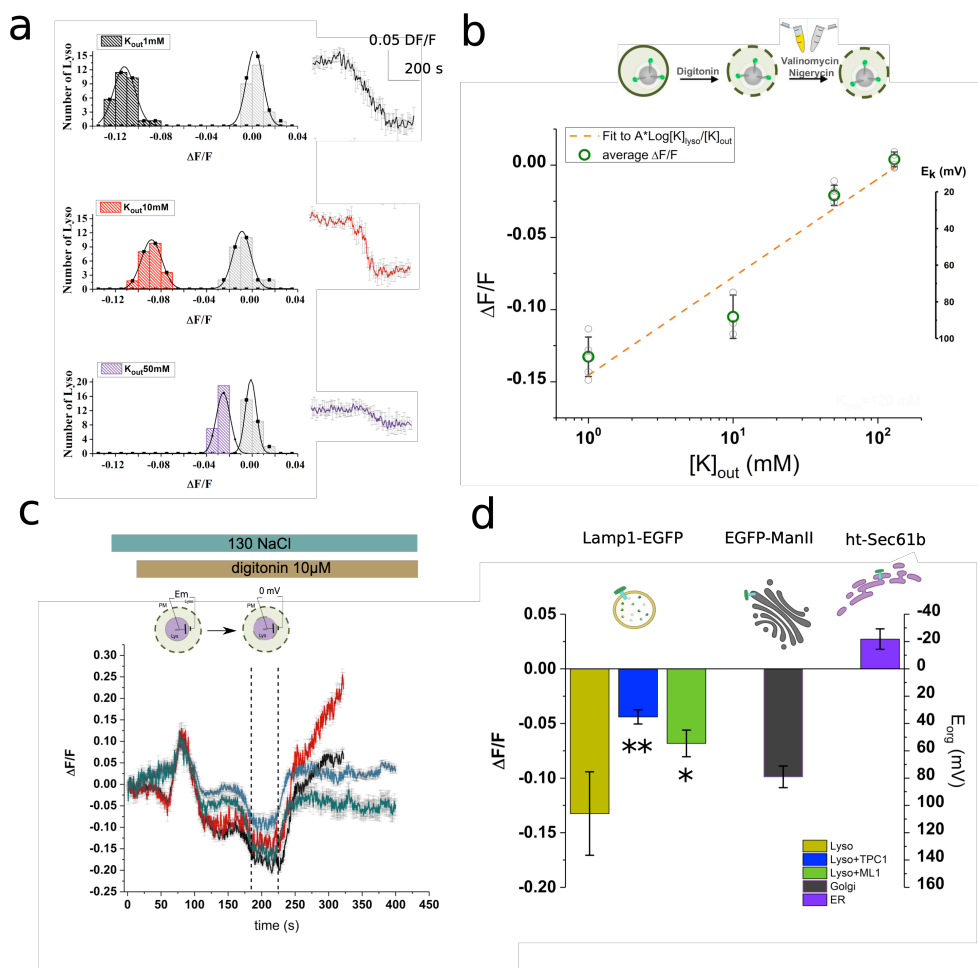

483

484 **Figure 3.**

485 Organellar

486 membrane

487 potentials are

488 measured at rest

489 using hVoS<sub>org</sub>. (a)

490 Representative

491 traces and

492 histograms used

493 during the

494 calibration

495 procedure. Data

496 represents one

497 single experiment in

498 which we observed

499 the paired response

500 of more than 20

501 lysosomes per

502 condition. (b) *In-cell*

503 calibration of

504 hVoS<sub>org</sub> by

505 potassium clamp. The cartoon on top indicates the steps of the procedure, which included gentle permeabilization

506 and incubation of ionophores. Averaged  $\Delta F/F$  values (green circles) from 5 independent experiments (gray circles)

507 were plotted versus the lysosomal external concentration of potassium. The experimental values were fitted to a

508 Nernst equation as indicated on the top left corner, where A corresponds to  $(RT/zF)$ ;  $z = 1$ , F, R, and T have their

509 usual meanings. The concentration of potassium when  $\Delta F/F$  is zero was estimated to be 120 mM, indicating that the

510 equilibration procedure was effective. (c) Representative traces used to estimate the resting potential. Cells were

511 incubated in normal extracellular ringer and exposed to 10  $\mu$ M digitonin as indicated on top. The cartoon indicates

512 the expected values of membrane potential. During the procedure the cell experience two sequential steps of

513 permeabilization (plasma membrane and lysosomal membrane), indicated in the cartoon. The second

514 permeabilization step brings  $\Psi_{ly}$  to zero (indicated by dashed vertical lines) before the final disruption of the

515 lysosomal membrane. **(d)** Resting membrane potential of Lysosomes, Golgi, and ER. Error bars indicate Mean  $\pm$   
 516 SD; \*\*P < 0.01 (one-way ANOVA with Bonferroni post hoc test).

517

518

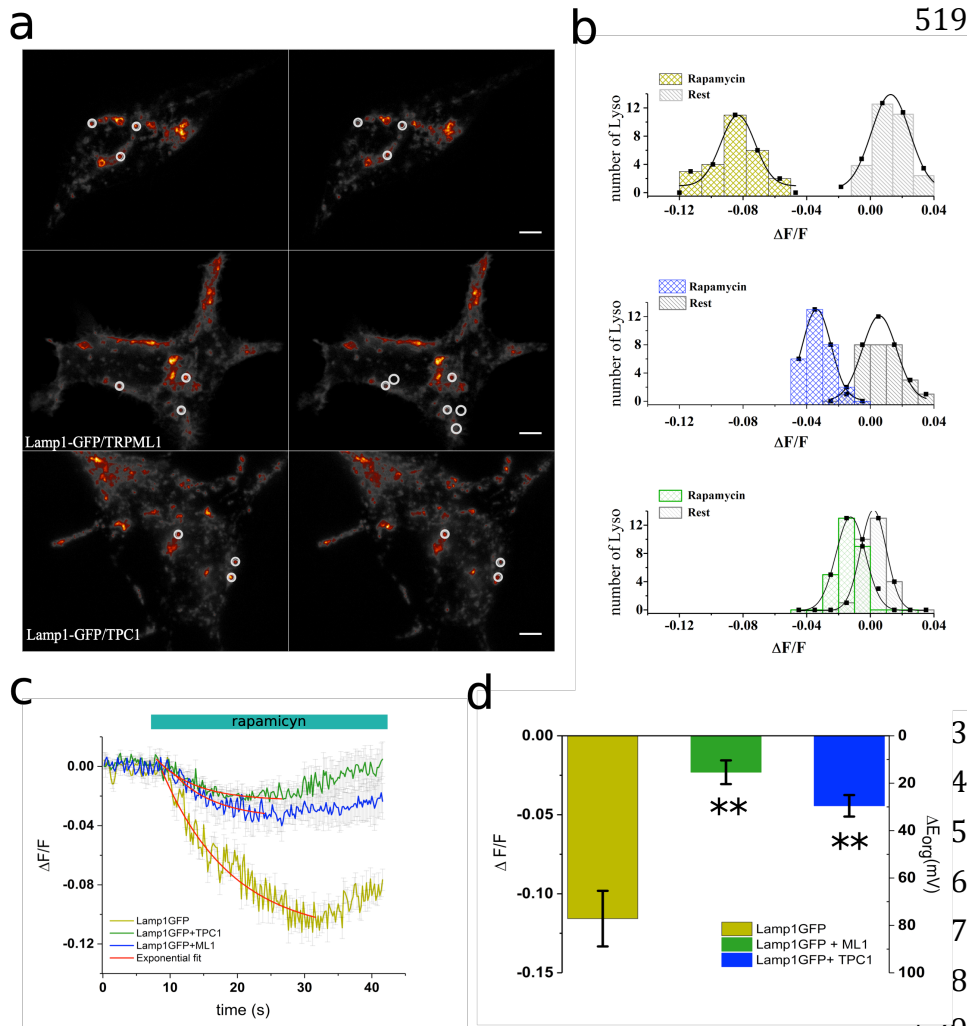

519

**Figure 4.** hVoS<sub>org</sub> can detect a rapamycin-induced, lysosome-specific electrical response. **(a)** Pseudo color images of HEK293 cells transiently expressing Lamp1-EGFP alone (*top panels*) or co-expressing either TRPML1 or TRPC channels (*middle and bottom panels respectively*). Bar = 5 μm. **(b)** Representative traces and histograms used during the calibration procedure. Data represents one single experiment in which we observed the paired response of more than 25 lysosomes per condition. **(c)**

**Figure 4. Matamala et al.** Representative traces of rapamycin-induced

542 depolarization of lysosomes in the different conditions. Red traces correspond to the fit to a first order exponential  
 543 decay function. **(d)** Changes in the lysosomal membrane potential in the presence of the mTOR inhibitor rapamycin  
 544 (5 μM). Error bars indicate Mean  $\pm$  SD; \*\*P < 0.01 (one-way ANOVA with Bonferroni post hoc test).

545

546

547

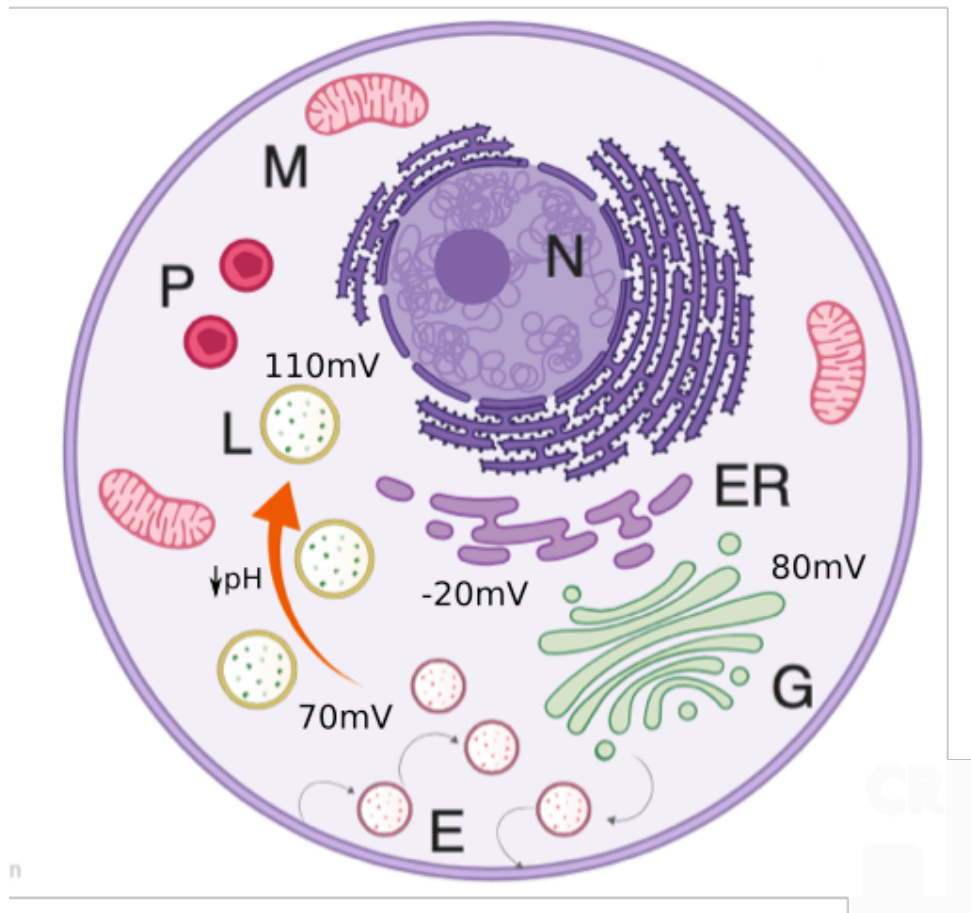

548

Figure 5. Matamala et al.

549 **Figure 5.** Schematic model of organellar membrane potential. Under normal conditions, lysosomes (L, yellow) and  
550 golgi (G, green) compartments have a relatively large and positive resting potential that contrast with a more modest  
551 and negative inside potential observed for ER (purple). Pumping of protons into the lysosomal lumen by the V-  
552 ATPase leads to acidification, causing a more hyperpolarized membrane potential in the mature lysosome (orange  
553 arrow).
